# Supplementary figures and images for: Moraxella catarrhalis induces CEACAM3‐Syk‐CARD9‐dependent activation of human granulocytes
Source: PubMed Central journal article supplement — Cell Microbiol. 2016 May 3;18(11):1570–82. doi: 10.1111/cmi.12597 (PMC5096018; doi:10.1111/cmi.12597), 2016-05-03

# Supplementary Fig.1

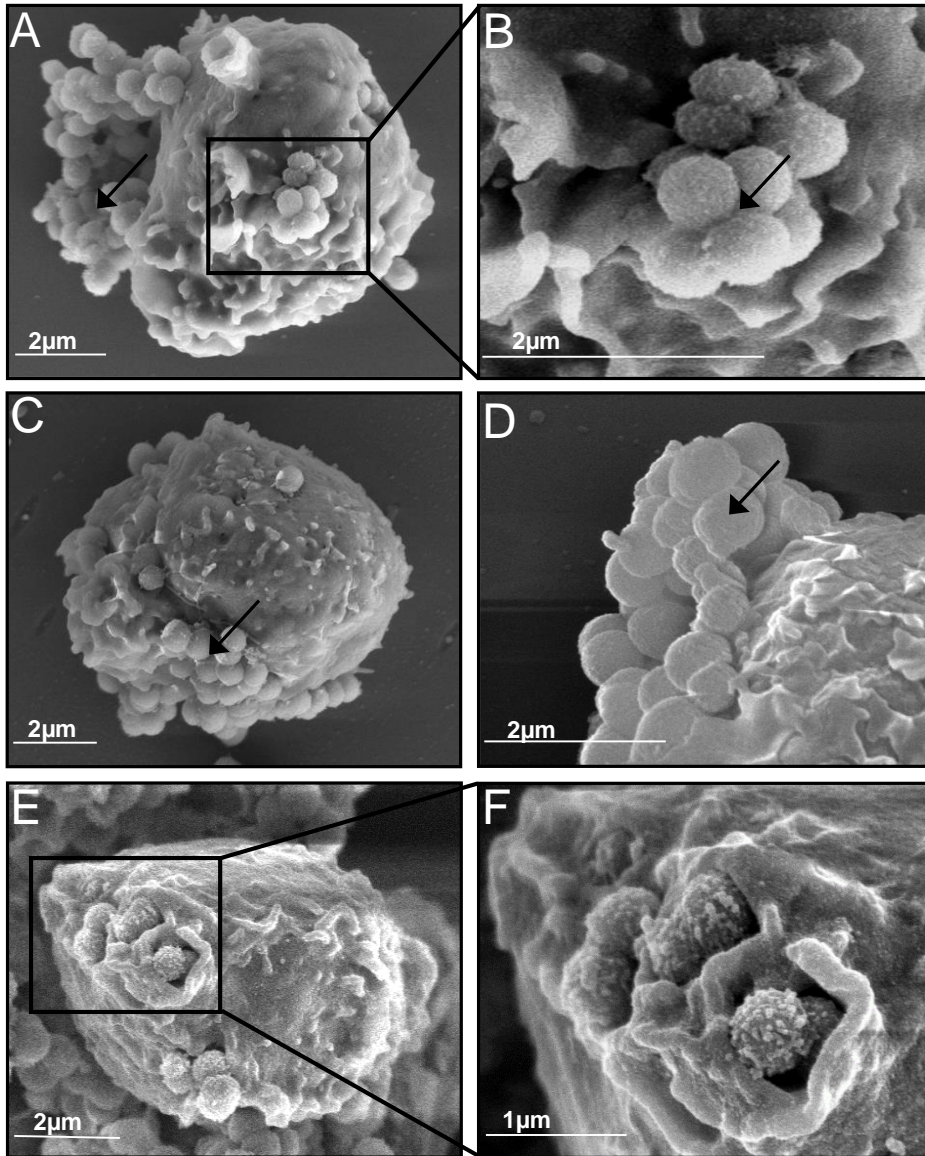

Supplement: CMI-18-1570-s001.pdf [file CMI-18-1570-s001.pdf]

Supplementary Fig. 2

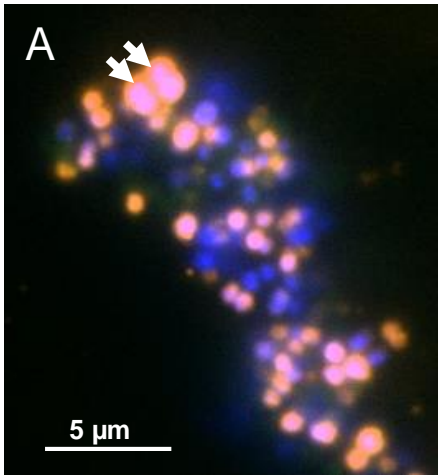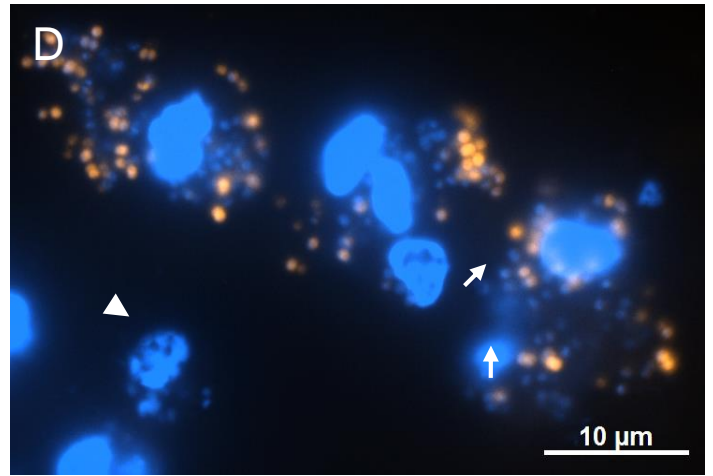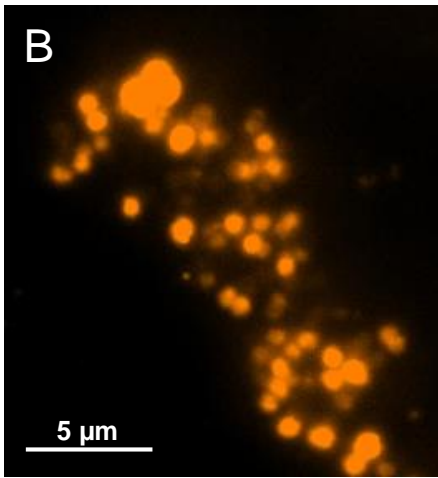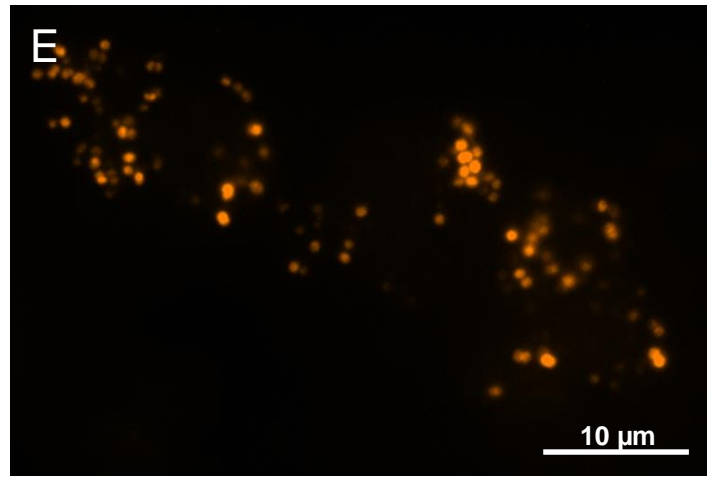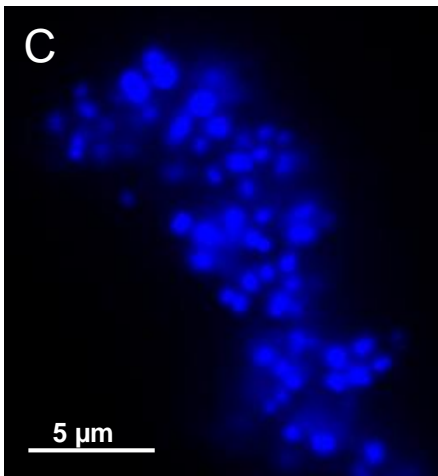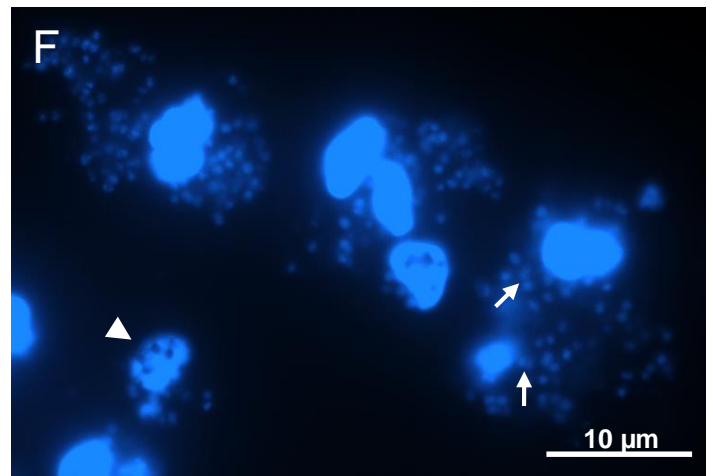

Supplement: CMI-18-1570-s002.pdf [file CMI-18-1570-s002.pdf]

# Supplementary Fig. 4

## A

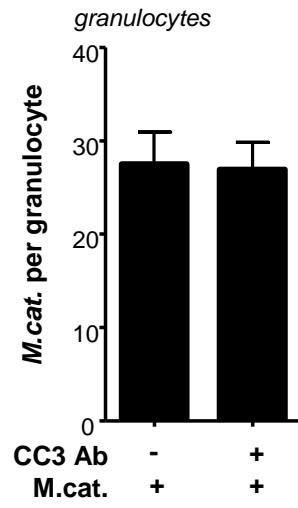

## B

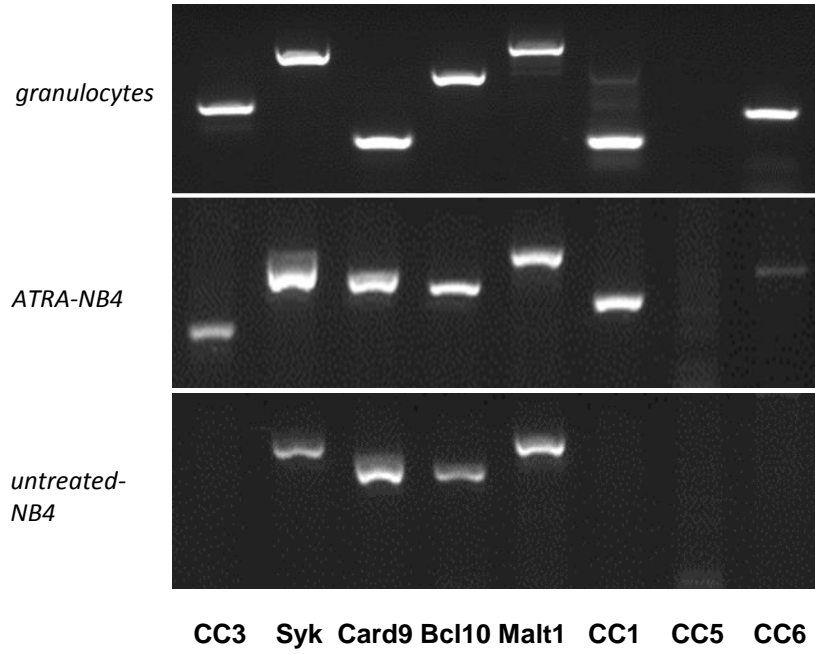

Supplement: CMI-18-1570-s004.pdf [file CMI-18-1570-s004.pdf]

Supplementary Fig. 5

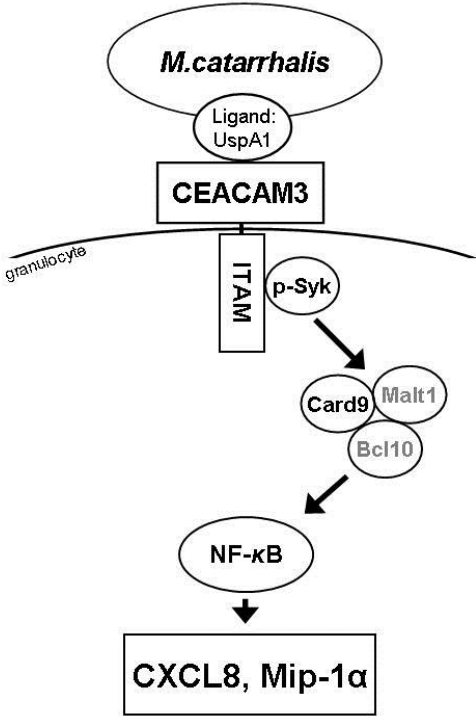

Supplement: CMI-18-1570-s005.pdf [file CMI-18-1570-s005.pdf]
